# Supplementary material
Source: PubMed Central journal article supplement (PMC5391274)
Supplement: NIHMS849349-supplement-supp_guide.pdf [file NIHMS849349-supplement-supp_guide.pdf]

### Supplementary Table 1

Title: Summary of lifespan statistics

Experiments used in figures are indicated in the right-most column. Mean lifespan and s.e.m. were calculated by log-rank test using triplicate samples, each containing 25-35 worms. # worms: total number of worms died in this assay/(total died + total censored). Censored worms included ones underwent “matricide,” exhibited ruptured vulva, or crawled off the plates.

### Supplementary Table 2

Title: List of genes analyzed in the germline RNA-seq samples

Table columns:

|                |                                                                                                                                                                                            |
|----------------|--------------------------------------------------------------------------------------------------------------------------------------------------------------------------------------------|
| baseMean       | mean of normalized counts across all germline samples                                                                                                                                      |
| log2FoldChange | log2 fold change of <i>ash-2</i> RNAi vs. empty vector<br>(Positive log2FoldChange: Higher expression in <i>ash-2</i> RNAi;<br>Negative log2FoldChange: Higher expression in empty vector) |
| lfcSE          | standard error                                                                                                                                                                             |
| stat           | Wald statistic                                                                                                                                                                             |
| pvalue         | Wald test p-value                                                                                                                                                                          |
| padj           | FDR-adjusted p-value                                                                                                                                                                       |

### Supplementary Table 3

Title: List of genes analyzed in the intestine RNA-seq samples

Table columns:

|                |                                                                                                                                                                                            |
|----------------|--------------------------------------------------------------------------------------------------------------------------------------------------------------------------------------------|
| baseMean       | mean of normalized counts across all intestine samples                                                                                                                                     |
| log2FoldChange | log2 fold change of <i>ash-2</i> RNAi vs. empty vector<br>(Positive log2FoldChange: Higher expression in <i>ash-2</i> RNAi;<br>Negative log2FoldChange: Higher expression in empty vector) |
| lfcSE          | standard error                                                                                                                                                                             |
| stat           | Wald statistic                                                                                                                                                                             |
| pvalue         | Wald test p-value                                                                                                                                                                          |
| padj           | FDR-adjusted p-value                                                                                                                                                                       |

### Supplementary Table 4

Title: List of “germline-enriched” genes

Genes were determined “germline-enriched” if the lowest expression value ( $\log_2(\text{FPKM}+1)$ ) observed in the germline empty vector samples was at least 2-fold higher than the highest expression value observed in the intestine empty vector samples (5,494 genes). Showing  $\log_2(\text{FPKM}+1)$  values for all “germline-enriched” genes and all samples.

### **Supplementary Table 5**

Title: List of “intestine-enriched” genes

Genes were determined “intestine-enriched” if the lowest expression value ( $\log_2(\text{FPKM}+1)$ ) observed in the intestine empty vector samples was at least 2-fold higher than the highest expression value observed in the germline empty vector samples (1,418 genes). Showing  $\log_2(\text{FPKM}+1)$  values for all “intestine-enriched” genes and all samples.

### **Supplementary Table 6**

Title: List of *C. elegans* strains used in this study

List of published and newly generated *C. elegans* strains used in this study.

### **Supplementary Table 7**

Title: List of primers used in this study

List of RT-qPCR and genotyping primers used in this study.

### **Supplementary Table 8**

Title: Raw data obtained from GC-MS in this study

Raw data generated by GC-MS experiments shown in this manuscript.
